# Supplementary material for: Stability of Naked Nucleic Acids under Physical Treatment and Powder Formation: Suitability for Development as Dry Powder Formulations for Inhalation
Source: MDPI journal article supplement (doi:10.3390/pharmaceutics15122786), 2023-12-16
Supplement: s1 [file s1]

### Captions for Supplementary Figures

**Figure S1.** Gel electrophoresis images for identifying (A) pDNA and (B) siRNA **structures** in Figure 1: (a) molecular size marker for pDNA (4361, 6557, and 9416 bp), (b) fresh pDNA, (c) digested pDNA, and (d) molecular size marker for siRNA (17, 21, and 25 bp). Dotted squares represent the regions shown in Figure 1. OC: open-circular, L: linear, SC: supercoiled, and bp: base pairs.

**Figure S2.** Gel electrophoresis images for identifying (A) pDNA and (B) siRNA **structures** in Figure 3: (a) molecular size marker for pDNA (4361, 6557, and 9416 bp), (b) fresh pDNA, (c) digested pDNA, and (d) molecular size marker for siRNA (17, 21, and 25 bp). Dotted squares represent the regions shown in Figure 3. OC: open-circular, L: linear, SC: supercoiled, and bp: base pairs.
